# Supplementary material
Source: PubMed Central journal article supplement (PMC1317961)
Supplement: pnas_0509182102_1.pdf [file pnas_0509182102_1.pdf]

**Table 6. Correlation between subtypes of TILs showing that the number of TILs positively correlated with each other for most subtypes, for both intraepithelial and stro**

| Correlation between TIL subtypes |                         | Intraepithelial |                      |                 |                     |                     |                     |             |             |
|----------------------------------|-------------------------|-----------------|----------------------|-----------------|---------------------|---------------------|---------------------|-------------|-------------|
|                                  |                         | CD25FOXP3       | Intraepithelial Treg | Individual CD20 | Intraepithelial CD8 | Intraepithelial CD4 | Intraepithelial CD3 | Stromal CD8 | Stromal CD4 |
| Stromal CD3                      | Correlation coefficient | <b>0.50</b>     | 0.16                 | <b>0.69</b>     | <b>0.55</b>         | <b>0.39</b>         | <b>0.56</b>         | <b>0.70</b> | <b>0.70</b> |
|                                  | P value                 | <0.001*         | 0.083                | <0.001*         | <0.001*             | <0.001*             | <0.001*             | <0.001*     | <0.001*     |
| Stromal CD4                      | Correlation coefficient | <b>0.49</b>     | <b>0.21</b>          | <b>0.64</b>     | <b>0.39</b>         | <b>0.45</b>         | <b>0.51</b>         | <b>0.53</b> |             |
|                                  | P value                 | <0.001*         | 0.021*               | <0.001*         | <0.001*             | <0.001*             | <0.001*             | <0.001*     |             |
| Stromal CD8                      | Correlation coefficient | <b>0.45</b>     | 0.16                 | <b>0.64</b>     | <b>0.48</b>         | <b>0.21</b>         | <b>0.40</b>         |             |             |
|                                  | P value                 | <0.001*         | 0.084                | <0.001*         | <0.001*             | 0.022*              | <0.001*             |             |             |
| Intraepithelial CD3              | Correlation coefficient | <b>0.48</b>     | <b>0.31</b>          | <b>0.50</b>     | <b>0.85</b>         | <b>0.58</b>         |                     |             |             |
|                                  | P value                 | <0.001*         | 0.001*               | <0.001*         | <0.001*             | <0.001*             |                     |             |             |
| Intraepithelial CD4              | Correlation coefficient | <b>0.52</b>     | <b>0.40</b>          | <b>0.39</b>     | <b>0.55</b>         |                     |                     |             |             |
|                                  | P value                 | <0.001*         | <0.001*              | <0.001*         | <0.001*             |                     |                     |             |             |
| Intraepithelial CD8              | Correlation coefficient | <b>0.48</b>     | <b>0.24</b>          | <b>0.49</b>     |                     |                     |                     |             |             |
|                                  | P value                 | <0.001*         | 0.009*               | <0.001*         |                     |                     |                     |             |             |
| Individual CD20                  | Correlation coefficient | <b>0.51</b>     | <b>0.23</b>          |                 |                     |                     |                     |             |             |
|                                  | P value                 | <0.001*         | 0.014*               |                 |                     |                     |                     |             |             |
| Intraepithelial Treg             | Correlation coefficient | <b>0.27</b>     |                      |                 |                     |                     |                     |             |             |
|                                  | P value                 | 0.004*          |                      |                 |                     |                     |                     |             |             |
